# Supplementary material
Source: ML conference proceedings conference paper supplement (https://openreview.net/forum?id=aVQZ4Dq9Xd)
Supplement: supplementary_material [file attachment]

# SIMKO: SIMPLE PASS@K POLICY OPTIMIZATION

Anonymous authors

Paper under double-blind review

## ABSTRACT

Reinforcement learning with verifiable rewards (RLVR) has advanced the reasoning capabilities of large language models (LLMs). However, prevailing RLVR methods exhibit a systematic bias toward exploitation over exploration, as evidenced by improved pass@1 but reduced pass@K ( $K > 1$ ) performance. Such bias limits the advancement of LLMs’ reasoning frontier. To understand this issue, we analyze training dynamics of RLVR methods by tracking the token-level probability distributions over vocabulary candidates. Our analysis reveals a consistent probability concentration effect where the top-1 candidate increasingly accumulates probability mass and suppresses that of other candidates. More importantly, stronger over-concentration correlates with worse pass@K performance. Inspired by this finding, we propose **Simple Pass@K Optimization (SimKO)**, a method designed to mitigate the over-concentration issue, thereby encouraging exploration. SimKO operates in an asymmetrical manner. For verified-correct responses, it boosts the probabilities of the top-K candidates. For verified-incorrect responses, it applies stronger penalties to the top-1 candidate. We observe that this asymmetric design is particularly effective at mitigating over-concentration when applied at tokens with high entropy. Across various math and logical-reasoning benchmarks, SimKO consistently yields higher pass@K for a wide range of K, providing a simple way to improve RLVR’s exploration.

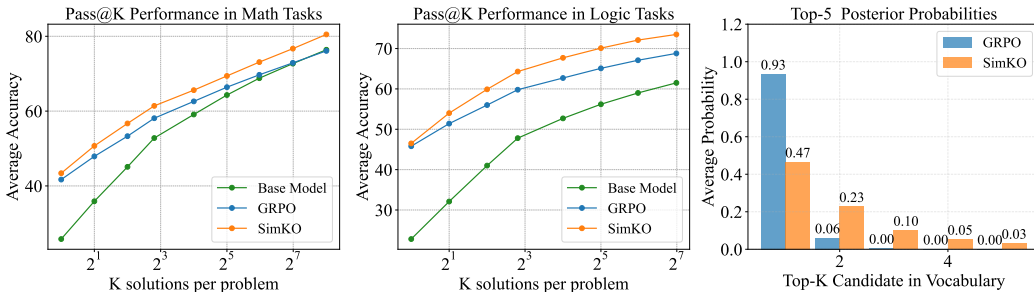

Figure 1: SimKO improves pass@K performance on math tasks (AIME24/25, AMC, MATH500, Minerva, Olympiadbench) and logic tasks (Synlogic, BBH) compared to GRPO, as shown in the plots (left and middle). The figure on the right shows the  $k$ -th highest candidate probabilities averaged over the dataset. The SimKO-trained model exhibits a less concentrated probability distribution compared to GRPO.

## 1 INTRODUCTION

Reinforcement Learning with Verifiable Rewards (RLVR) offers a simple recipe for improving LLM reasoning: the model generates responses, and updates itself by increasing the probability of the correct ones while decreasing that of the incorrect ones. This coupled process induces a systematic bias, whereby the model progressively collapses to a narrow set of safe responses, prioritizing exploitation over exploration. The effect is evident in improved pass@1, which measures the expected quality of a single reasoning path, but degraded pass@K, which measures the coverage of multiple reasoning paths (Yue et al., 2025; Wu et al., 2025). The reduced exploration ability limits the model’s reasoning potential and deteriorates its ability to generalize to novel or more challenging scenarios.

Several approaches have been proposed to mitigate this exploration deficit. *Data-centric* methods focus on data augmentation, exposing the model to broader reasoning environments to promote

response diversity. Techniques include using off-policy data (Dong et al., 2025; Li et al., 2025), generating more diverse responses (Yang et al., 2025), and creating new task variations from the model itself (Liang et al., 2025). As a complementary line of work, *reward-centric* methods derive group-wise rewards to evaluate the collective quality of multiple responses. These approaches provide an unbiased estimate of pass@K (Walder & Karkhanis, 2025; Chen et al., 2025), which the model can then directly optimize. Despite their promise, both families of methods operate only at the level of inputs or outputs, leaving the internal learning dynamics underexplored. More recently, *entropy-based* methods (Cui et al., 2025; Cheng et al., 2025) treat output entropy as a proxy for exploration. While these methods yield valuable insights, entropy remains a coarse and incomplete measure that cannot capture fine-grained exploration behavior.

We take an alternative perspective based on the mechanism of next-token prediction. At each decoding step, an LLM predicts a probability distribution over its entire vocabulary, offering a direct and fine-grained view of its exploration behavior. How probability mass is distributed across vocabulary candidates, determines whether the model is exploring multiple reasoning paths or collapsing into a single deterministic trajectory. Unfortunately, capturing the full distribution is computationally prohibitive, as modern vocabularies often exceed 100K candidates. This practical constraint likely explains why prior work has favored scalar measures like entropy over the full distribution.

In this work, we revisit the token-level probability distribution. Our empirical evidence shows that these distribution are highly skewed, as illustrated in Figure 1, with only a few candidates carrying non-negligible probability mass. This finding justifies a tractable approximation: by focusing on the top-K candidates, we can effectively characterize exploration behavior. Building on this view, we further analyze the training dynamics of RLVR algorithms and uncover a salient trend: probability mass gradually concentrates on the top-1 candidate, while other candidates are suppressed. This over-concentration pushes the model toward deterministic behavior and, more importantly, directly explains the degradation of pass@K performance.

Motivated by this observation, we propose **Simple Pass@K Optimization (SimKO)**, a method designed to explicitly mitigate distribution collapse. The core idea is to redistribute gradient updates across the top-K candidates rather than allowing the top-1 to dominate. For verified-correct responses, SimKO shares positive gradients between the generated token and other high-probability candidates, reducing over-concentration on a single choice. For incorrect responses, SimKO applies stronger penalties to the top-1 candidate, encouraging probability mass to flow into alternative candidates. This asymmetric regularization proves especially effective when applied to “semantic forking” in the reasoning path, where token-level entropy is high.

We evaluate SimKO on several mathematical and logical reasoning benchmarks across multiple LLM backbones. SimKO consistently improves over vanilla GRPO and surpasses strong baselines across a wide range of K values (up to 256), as shown in Figure 1. Ablation studies further confirm the mechanism behind its gains, offering new evidence for the role of probability concentration in the exploration–exploitation trade-off. In summary, our work makes three key contributions:

- A new perspective on RLVR dynamics. We introduce top-K posterior probabilities as a tractable approximation of the full token-level distribution, providing direct insight into why existing RLVR methods often improve pass@1 at the cost of exploration.
- A simple yet principled method. We propose SimKO, which mitigates probability collapse through asymmetric gradient redistribution. By redistributing probability mass from overconfident top-1 tokens to other promising candidates, SimKO explicitly promotes exploration.
- Improved pass@K performance. We demonstrate SimKO’s effectiveness on multiple math and logic benchmarks, showing consistent improvements in pass@K without sacrificing pass@1.

## 2 BACKGROUND AND PRELIMINARIES

Group Relative Policy Optimization (GRPO), a representative policy-based RLVR method (Shao et al., 2024), is a variant of PPO (Schulman et al., 2017) tailored for LLM fine-tuning. Given a question, the model generates  $G$  different responses and updates its parameters according to the loss:

$$\mathcal{J}_{\text{GRPO}}(\theta; \gamma_{i,l}) = \frac{1}{G} \sum_{i=1}^G \frac{1}{|y_i|} \sum_{l=1}^{|y_i|} [\min(\gamma_{i,l} A_{i,l}, \text{clip}(\gamma_{i,l}, 1 - \epsilon, 1 + \epsilon) A_{i,l}) - \beta \mathbb{D}_{\text{KL}}(\pi_{\theta} || \pi_{\text{ref}})]$$

108  
109  
110  
111  
112  
113  
114  
115  
116  
117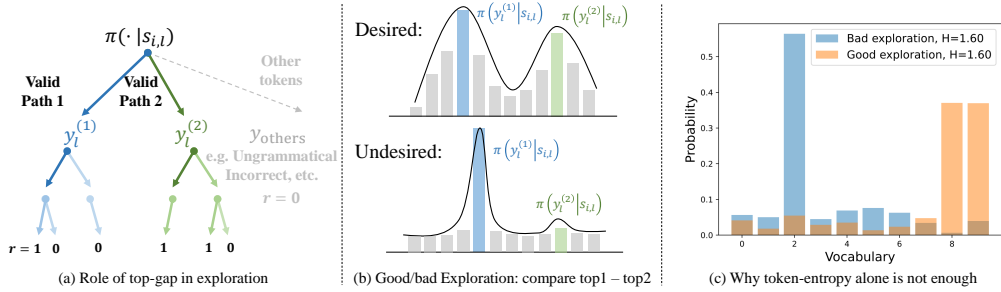

Figure 2: (a) The exploration behavior visualized according to the token-level posterior probability. (b) Comparison of two exploration strategy. (c) An example of two distributions with identical entropy but distinct probability distribution.

121  
122  
123  
124  
125  
126  
127  
128  
129  
130  
131

where  $\gamma_{i,l} = \pi_{\theta}(y_{i,l} | s_{i,l}) / \pi_{\text{ref}}(y_{i,l} | s_{i,l})$  is the likelihood ratio between the current policy  $\pi_{\theta}$  and the reference policy  $\pi_{\text{ref}}$  at the  $l$ -th token of response  $y_i$ , with  $s_{i,l} = (x, y_{i,<l})$  denoting the decoding state. The term  $A_{i,l}$  represents the advantage of the  $l$ -th token in the  $i$ -th response, computed by normalizing rewards within the roll-out.

GRPO can be analyzed in gradient space under the learning-dynamics framework of Ren & Sutherland (2025). The dominant contribution to parameter updates comes from  $\nabla_{\theta} A_{i,l} \gamma_{i,l}$ . Here, the advantage  $A_{i,l}$  can be viewed as a sequence-level adaptive learning rate that scales gradients from different responses  $y_i$ . Ignoring the contributions of the KL regularization and clipping terms (both primarily introduced for stability), the main optimization direction of most GRPO-based methods is governed by:

$$\nabla_{\theta} A_{i,l} \gamma_{i,l} = A_{i,l} \frac{\pi_{\theta}(y_{i,l} | s_{i,l})}{\pi_{\text{ref}}(y_{i,l} | s_{i,l})} \nabla_{\theta} \log \pi_{\theta}(y_{i,l} | s_{i,l}) = A_{i,l} \cdot \text{sg}(\gamma_{i,l}) \cdot \nabla_{\theta} \log \pi_{\theta}(y_{i,l} | s_{i,l}), \quad (1)$$

132  
133  
134  
135

where  $\text{sg}(\cdot)$  is the stopping-gradient operator.

136  
137

### 3 OVER-CONCENTRATED DISTRIBUTION DEGRADES PASS@K SCORE

138  
139  
140  
141  
142  
143  
144

To understand the mechanism driving current RLVR methods to favor exploitation over exploration, we begin by examining the connection between the model’s token-level probability distribution and its pass@K performance. We consider the illustrative example in Figure 2-(a), where the model generates the  $l$ -th token given the context  $s_{i,l} = (x, y_{i,<l})$ . Suppose two valid reasoning paths begin with  $y_l^{(1)}$  and  $y_l^{(2)}$ , where  $y_l^{(k)}$  denotes the rank- $k$  candidate under  $\pi_{\theta}(\cdot | s_{i,l})$ . A model with strong exploration ability will distribute probability more evenly between  $\pi_{\theta}(y_l^{(1)} | s_{i,l})$  and  $\pi_{\theta}(y_l^{(2)} | s_{i,l})$ , as illustrated in the upper panel of Figure 2-(b).

145  
146

To track the token probability distribution among top-K candidates, we propose to compute

147  
148  
149

$$\Lambda^{(k)} := \mathbb{E}_{x_i \sim \mathcal{D}, y \sim \pi_{\theta}(\cdot | s_{i,l})} \left[ \frac{1}{L} \sum_{l=1}^L \log \pi_{\theta}(y_l^{(k)} | s_{i,l}) \right], \quad k \in \{1, \dots, K\}. \quad (2)$$

150  
151  
152  
153

This metric represents the average log-probability of the rank- $k$  candidate during generation. Despite the large vocabulary size, Figure 1 shows the probability mass is highly concentrated in the top few candidates. Empirically, we find that top-3 candidates (*i.e.*  $k=3$ ) is a sufficient and efficient for approximating the distribution.

154  
155  
156  
157

In addition to the probability of the rank- $k$  candidate, we track the evolution of the average log-probability of the token sequence that is actually sampled, which is denoted as  $\Lambda$ .<sup>1</sup> Since updates occur directly on these tokens, the gap between  $\Lambda$  and other  $\Lambda^{(k)}$  more precisely indicates exploitation: a larger gap reflects the model’s tendency to concentrate on a single reasoning path.

158  
159  
160  
161

To better disentangle the roles of positive and negative gradients, central to our algorithm design, we also conduct two ablations where the model is updated using only one type of response. We refer to these as Positive Sample Reinforce (PSR) and Negative Sample Reinforce (NSR) (Zhu et al., 2025).

<sup>1</sup>Just replace the  $y_l^{(k)}$  term in Equation 2 by the sampled candidate.

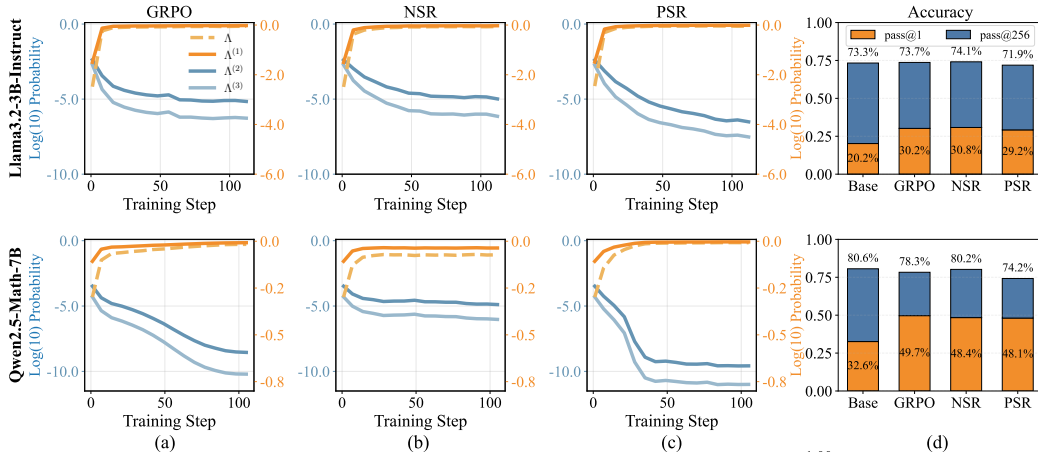

Figure 3: (a)-(c) Training dynamics of average log probability  $\Lambda$  and top-K probabilities  $\Lambda^{(k)}$  derived by GRPO, NSR, and PSR. (d) The corresponding pass@1 and pass@K results of the RLVL-trained models. Following the setups of Zhu et al. (2025), we train Llama3.2-3B-Instruct on a mixture of GSM8K and MATH (Level 1) and train Qwen2.5-Math-7B on the MATH dataset.

We present the learning dynamics in Figure 3. The results in first column reveals a clear trend under GRPO training: the probability of the rank-1 candidate,  $\Lambda^{(1)}$ , saturates near 1, while the probabilities of alternatives ( $\Lambda^{(2)}$ ,  $\Lambda^{(3)}$ ) collapse to negligible values ( $10^{-8}$ – $10^{-10}$  in Qwen2.5-Math-7B). This demonstrates that GRPO aggressively concentrates probability mass on the single best candidate. While NSR partially mitigates this effect, PSR significantly exacerbates it.

Crucially, we observe a clear inverse relationship between the degree of probability concentration and pass@K performance. As shown in Figure 3-(d), as the probability gap between the rank-1 candidate and its alternatives increases, the model’s pass@K accuracy declines. This suggests that over-concentration of posterior probability on the top-1 candidate suppresses the exploration of other plausible reasoning paths. This observation naturally motivates a key question: *If we can mitigate this over-concentration, can we improve pass@K performance by encouraging broader exploration?* Our algorithmic design is precisely driven by this intuition and presented in the next section.

## 4 SIMKO: SIMPLE PASS@K OPTIMIZATION

In this section, we present the three key components of our SimKO method: (i) identifying “forking” tokens for reasoning, (ii) applying top-K label smoothing to redistribute positive gradients among the top-K candidates, and (iii) strengthening rank-1 candidate updates for negative gradients. These steps, illustrated in Figure 4, work together to improve reasoning diversity.

### 4.1 IDENTIFYING INFORMATIVE TOKENS TO OPTIMIZE

While standard on-policy RLVR methods compute gradients over the entire generated sequence, not all tokens contribute equally to logical inference. Recent work (Wang et al., 2025) shows that only a small subset of tokens drives the core reasoning process, whereas the majority (over 80%) primarily ensure grammatical fluency and formatting. Our analysis supports this finding by showing that key reasoning tokens, often marked by “forking” points, often exhibit higher entropy and shape the reasoning trajectory (Figure 4-(a)).

Building on this insight, SimKO selectively operate on a critical subset of tokens whose entropy is greater than a threshold  $\tau$ . In short, by replacing the  $\gamma_{i,l}$  in the vanilla GRPO loss with a newly defined  $\tilde{\gamma}_{i,l}$ , the proposed method can be written as:

$$\mathcal{J}_{\text{SimKO}}(\theta) = \mathcal{J}_{\text{GRPO}}(\theta; \gamma_{i,l} \rightarrow \tilde{\gamma}_{i,l}); \quad \tilde{\gamma}_{i,l} := \begin{cases} \gamma_{i,l}^{\text{pos}}, & \text{if } \mathcal{H}(\pi_{\theta}(\cdot|s_{i,l})) > \tau, A_{i,l} > 0, \\ \gamma_{i,l}^{\text{neg}}, & \text{if } \mathcal{H}(\pi_{\theta}(\cdot|s_{i,l})) > \tau, A_{i,l} < 0, \\ \gamma_{i,l}, & \text{if } \mathcal{H}(\pi_{\theta}(\cdot|s_{i,l})) \leq \tau, \forall A_{i,l}, \end{cases} \quad (3)$$

where  $\mathcal{H}(\pi_{\theta}(\cdot|s_{i,l})) = -\sum_{y \in \mathcal{Y}} \pi_{\theta}(y | s_{i,l}) \log \pi_{\theta}(y | s_{i,l})$  denotes the entropy of the policy distribution at state  $s_{i,l}$ .  $A_{i,l}$  is the advantage calculated in vanilla GRPO.

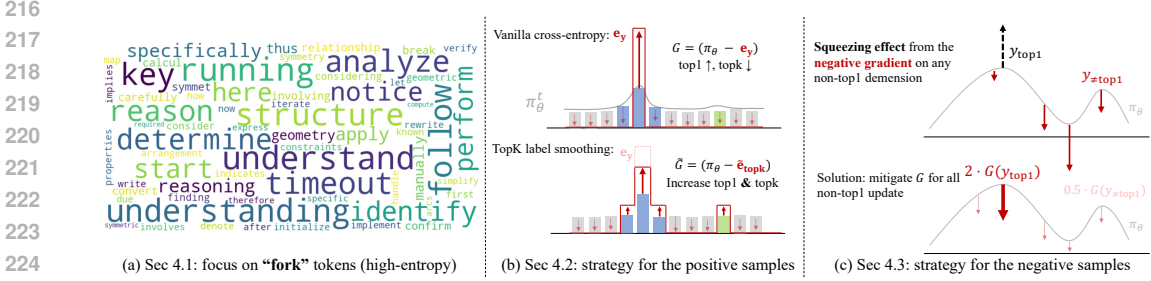

Figure 4: Intuition of the proposed method. (a) We begin by identifying the “forking” tokens, which are high-entropy tokens, and diverge into multiple reasoning paths. (b) For positive samples, we redistribute the probability mass from the top-1 candidate to the top-K candidates, mitigating overconcentration. (c) For negative samples, we apply a strong penalty to the top-1 candidate and a weaker penalty to non-top-1 candidates to prevent the squeezing effect, thereby avoiding sharp distributions and facilitating model exploration.

## 4.2 REDISTRIBUTING POSITIVE GRADIENTS AMONG TOP-K CANDIDATES

We now design regularization mechanisms for tokens with positive gradients, i.e., tokens from correct responses. To understand how the model’s predictions evolve after an update, we analyze its behavior in gradient space and denote the derivative of the loss with respect to the logits  $\mathbf{z}$  as  $\tilde{\mathcal{G}}$ -term:

$$\nabla_{\mathbf{z}} \log \pi_{\theta}(y_{i,l} | s_{i,l}) := \mathcal{G}(i, l) = \pi_{\theta}(\cdot | s_{i,l}) - \mathbf{e}_{y_{i,l}}, \quad (4)$$

where  $\mathbf{e}_{y_{i,l}}$  is the one-hot vector for the label  $y_{i,l}$ . We now analyze the one-step effect of learning the  $l$ -th token in the  $i$ -th correct response. As shown Figure 4-(b), one-step update increases the probability of the  $y_{i,l}$ -th candidate of  $\pi_{\theta}(\cdot | s_{i,l})$  while simultaneously decreasing all other candidates.

When  $y_{i,l}$  is the rank-1 candidate, which is highly likely under on-policy sampling, the distribution becomes sharper, and the probability gap between the rank-1 candidate and its alternatives grows. Continued training under this dynamic causes the rank-1 candidate to absorb nearly all probability mass, leaving the model unable to generate diverse yet correct responses that begin with rank- $k$  candidates. This effect is empirically validated by our results in Figure 3.

To address this issue, we need to design a mechanism that can reallocate probability mass absorbed by the rank-1 candidate back to other plausible ones, thereby restoring diversity. This resonates with the classical solution for over-concentration: label smoothing (Müller et al., 2019), in which the one-hot target  $\mathbf{e}_y$  is replaced by a convex combination of the one-hot and a uniform distribution:  $(1 - \alpha)\mathbf{e}_y + \frac{\alpha}{V-1}\mathbf{u}$ , where  $\alpha \in [0, 1]$  controls the smoothing strength.

However, directly applying vanilla label smoothing in LLM fine-tuning is problematic because the vocabulary size  $V$  is extremely large. Spreading probability mass uniformly risks generating ungrammatical or irrelevant tokens, which can destabilize training. To address this problem, we take inspiration from the design of top-K sampling (Fan et al., 2018), and propose top-K label smoothing, which redistributes probability only across several most plausible candidates. Concretely, by replacing the  $\mathbf{e}_y$  in Eqn. 4, we propose the  $\tilde{\mathcal{G}}$ -term:

$$\tilde{\mathcal{G}}(i, l) = \pi_{\theta}(\cdot | s_{i,l}) - \tilde{\mathbf{e}}_{\text{topk}} = \pi_{\theta}(\cdot | s_{i,l}) - ((1 - \alpha)\mathbf{e}_y + \frac{\alpha}{K} \sum_{k \in \mathcal{I}_{\text{topk}}} \mathbf{e}_k), \quad (5)$$

where  $\mathcal{I}_{\text{topk}}$  denotes the indices of the top-K tokens under the current model distribution. Importantly, we retain this definition even if  $y \in \mathcal{I}_{\text{topk}}$ , ensuring consistent treatment of the target token. We now present an equivalent loss function with the re-designed one-step gradient provided in Equation 5 as

$$\gamma_{i,l}^{\text{pos}} = (1 - \alpha) \gamma_{i,t} + \frac{\alpha}{|\mathcal{I}_{\text{topk}}|} \sum_{k \in \mathcal{I}_{\text{topk}}} \text{sg} \left( \frac{\gamma_{i,l}}{\gamma_{i,l}^{(k)}} \right) \gamma_{i,l}^{(k)}, \quad \alpha \in [0, 1], \quad (6)$$

where  $\gamma_{i,l}^{(k)} = \pi_{\theta}(y_{i,l}^{(k)} | s_{i,t}) / \pi_{\theta_{\text{ref}}}(y_{i,l}^{(k)} | s_{i,l})$ , which is the ratio of the model’s probability on the rank- $k$  candidate. The term  $\text{sg}(\cdot)$  is designed to make sure that  $\text{sg}(\gamma_{i,l}^{\text{pos}}) = \text{sg}(\gamma_{i,l})$ , which is crucial for importance sampling in GRPO-based methods (see Equation 1). More design details can be found in Appendix B. Intuitively, optimizing with  $\gamma_{i,l}^{\text{pos}}$  increases the probabilities of the top-K candidates, causing the output distribution to form a plateau rather than a sharp peak. This flatter distribution promotes exploration and enhances response diversity, as illustrated in Figure 4.

270  
271  
272  
273  
274  
275  
276  
277  
278  
279  
280  
281  
282  
283  
284  
285  
286  
287  
288  
289  
290  
291  
292  
293  
294  
295  
296  
297  
298  
299  
300  
301  
302  
303  
304  
305  
306  
307  
308  
309  
310  
311  
312  
313  
314  
315  
316  
317  
318  
319  
320  
321  
322  
323

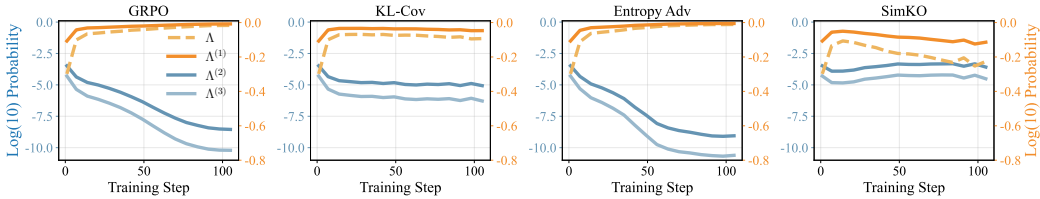

Figure 5: Comparison of SimKO with GRPO, KL-Cov, and Entropy-Adv on Qwen2.5-Math-7B. SimKO effectively controls probability concentration on the  $\Lambda^{(1)}$  while preserving diversity among  $\Lambda^{(2)}$  and  $\Lambda^{(3)}$ .

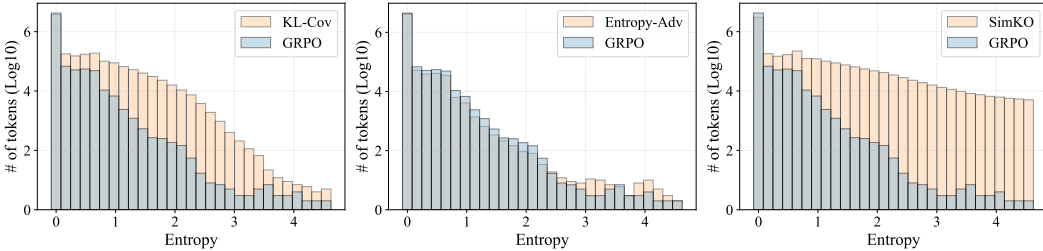

Figure 6: Token-level entropy distributions from the Qwen2.5-Math-7B backbone trained with SimKO, GRPO, KL-Cov, and Entropy-Adv, demonstrating SimKO’s ability to maintain the entropy of the “forking” tokens.

### 4.3 RESTRAINING NEGATIVE GRADIENTS ON TOP-1 CANDIDATE

We design a separate mechanism for negative responses because their gradients affect the probability distribution asymmetrically compared to positive gradients. As in the previous subsection, we analyze the one-step influence of negative gradients ( $A_{i,l} < 0$ ) through their  $\mathcal{G}$ -term. Expanding  $\mathcal{G}(i, l)$  element-wise (Equation 4) leads to:  $[\mathcal{G}(i, l)]_{y_{i,l}} = \pi_{\theta}(y|s_{i,l}) - 1$  and  $[\mathcal{G}(i, l)]_{\text{others}} = \pi_{\theta}(y|s_{i,l})$ . This formulation highlights two key effects. First, candidates with already high probabilities experience minimal push-down pressure when selected, since  $\pi_{\theta}(y_{i,l} | s_{i,l}) - 1 \approx 0$ . Second, the probability mass removed from the target candidate is redistributed proportionally across all other candidates based on their  $\pi_{\theta}(y | s_{i,l})$ . These mechanisms align with the “squeezing effect” described in Ren & Sutherland (2025), where the rank-1 candidate benefits the most during redistribution.

This dual influence also clarifies why simply amplifying negative gradients, e.g., by multiplying a big scalar  $c$  to those  $A_{i,l} < 0$ , is ineffective in mitigating the decay of exploration. While uniformly stronger push-down pressure can suppress probability growth of the rank-1 candidate, the induced squeezing effect on non-rank-1 candidates paradoxically makes the distribution sharper, as demonstrated in the upper panel of Figure 4-(c). In summary, for negative gradients, we must control the relative strength between the negative gradients imposed on rank-1 and non-rank-1 candidates.

Motivated by this, we propose to replace the original  $\gamma_{i,l}$  by  $\lambda \cdot \gamma_{i,l}$  when  $y_{i,l}$  is the rank-1 candidate, where  $\lambda$  is a hyper-parameter that is greater than one. The effect of applying this  $\gamma_{i,l}^{\text{neg}}$  is demonstrated by the lower panel in Figure 4-(c).

## 5 EXPERIMENTS AND RESULTS

### 5.1 EXPERIMENTAL SETUP

**Models and Datasets.** We experiment with a diverse set of models, including Qwen2.5-7B (Team, 2024), Qwen2.5-Math-7B (Yang et al., 2024), and Llama3.2-3B-Instruct (AI@Meta, 2024). Following the setups in Zhu et al. (2025); Zeng et al. (2025), the Qwen models are trained on the MATH dataset (Hendrycks et al., 2021), while the Llama model is trained on a combined dataset of GSM8K (Cobbe et al., 2021) and MATH (Level 1). For logical reasoning tasks, we train Qwen2.5-7B on the Synlogic-easy dataset (training split). Training details and hypens in Appendix D.1.

**Evaluation Protocol.** We compare SimKO against several competitive baselines, including GRPO, PSR, NSR, W-REINFORCE (Zhu et al., 2025), KL-Cov (Cui et al., 2025), and Entropy-Adv (Cheng et al., 2025). Evaluations are conducted on a variety of reasoning benchmarks: MATH-500 (Hendrycks et al., 2021), Minerva Math (Lewkowycz et al., 2022), Olympiad-Bench (He et al.,

| Method                      | 1           | 2           | 4           | 8           | 16          | 32          | 64          | 128         | 256         |
|-----------------------------|-------------|-------------|-------------|-------------|-------------|-------------|-------------|-------------|-------------|
| <b>Qwen2.5-Math-7B</b>      |             |             |             |             |             |             |             |             |             |
| Base Model                  | 25.8        | 35.9        | 45.1        | 52.8        | 59.1        | 64.3        | 68.8        | 72.7        | 76.4        |
| GRPO                        | 41.7        | 47.9        | 53.3        | 58.1        | 62.6        | 66.4        | 69.7        | 72.9        | 76.1        |
| PSR                         | 39.5        | 45.1        | 49.9        | 54.3        | 58.5        | 62.4        | 66.0        | 69.3        | 72.5        |
| NSR                         | 39.5        | 47.0        | 53.6        | 59.2        | 64.0        | 68.2        | 72.2        | 76.1        | <u>80.3</u> |
| W-REINFORCE                 | 41.5        | 48.6        | 54.4        | 59.5        | 64.1        | 68.4        | <u>72.4</u> | <u>76.3</u> | 80.2        |
| KL-Cov                      | <u>42.5</u> | <u>49.5</u> | <u>55.4</u> | <u>60.4</u> | <u>64.8</u> | <u>68.6</u> | 72.0        | 75.5        | 79.0        |
| Entropy-Adv                 | 42.1        | 47.7        | 52.6        | 56.7        | 60.3        | 63.9        | 67.7        | 71.9        | 76.1        |
| SimKO                       | <b>43.4</b> | <b>50.7</b> | <b>56.7</b> | <b>61.4</b> | <b>65.6</b> | <b>69.4</b> | <b>73.1</b> | <b>76.7</b> | <b>80.5</b> |
| $\Delta(\text{SimKO-GRPO})$ | +1.7        | +2.8        | +3.4        | +3.3        | +3.0        | +3.0        | +3.4        | +3.8        | +4.4        |
| <b>Qwen2.5-7B</b>           |             |             |             |             |             |             |             |             |             |
| Base Model                  | 26.6        | 35.0        | 42.7        | 49.5        | 55.6        | 61.1        | 66.2        | <b>71.3</b> | <b>76.4</b> |
| GRPO                        | <u>38.4</u> | <u>44.4</u> | <u>49.8</u> | <u>54.5</u> | 58.7        | 62.5        | 66.0        | 69.3        | 72.3        |
| PSR                         | 36.2        | 41.6        | 46.5        | 51.2        | 55.7        | 59.8        | 63.4        | 66.9        | 70.7        |
| NSR                         | 35.2        | 42.1        | 48.2        | 53.7        | 58.4        | 62.5        | 66.3        | 69.8        | 72.8        |
| W-REINFORCE                 | 35.9        | 42.7        | 48.8        | 54.0        | <u>58.8</u> | <b>63.3</b> | <b>67.3</b> | 71.1        | <u>75.2</u> |
| SimKO                       | <b>38.9</b> | <b>45.5</b> | <b>50.8</b> | <b>55.2</b> | <b>59.2</b> | <u>63.1</u> | <u>67.0</u> | 70.8        | 74.3        |
| $\Delta(\text{SimKO-GRPO})$ | +0.5        | +1.1        | +1.0        | +0.7        | +0.5        | +0.6        | +1.0        | +1.5        | +2.0        |
| <b>Llama3.2-3B-Instruct</b> |             |             |             |             |             |             |             |             |             |
| Base Model                  | 14.2        | 20.7        | 28.0        | 35.6        | 43.1        | 50.2        | 57.2        | 63.6        | 68.9        |
| GRPO                        | <u>23.3</u> | <u>29.4</u> | <u>35.7</u> | 41.4        | 46.9        | 52.4        | 57.9        | 63.7        | 69.5        |
| PSR                         | 20.6        | 26.1        | 32.0        | 37.9        | 43.9        | 49.8        | 55.8        | 61.8        | 67.8        |
| NSR                         | 22.5        | 29.1        | 35.6        | <u>41.6</u> | <u>47.4</u> | <u>53.1</u> | <u>58.6</u> | <u>64.1</u> | <u>69.7</u> |
| W-REINFORCE                 | 22.4        | 28.8        | 34.9        | 40.8        | 46.4        | 52.0        | 57.5        | 63.1        | 68.1        |
| SimKO                       | <b>24.0</b> | <b>30.3</b> | <b>36.4</b> | <b>42.0</b> | <b>47.6</b> | <b>53.3</b> | <b>58.9</b> | <b>64.8</b> | <b>70.8</b> |
| $\Delta(\text{SimKO-GRPO})$ | +0.7        | +0.9        | +0.7        | +0.6        | +0.7        | +0.9        | +1.0        | +1.2        | +1.3        |

Table 1: Average pass@256 results for Qwen2.5-Math-7B, Qwen2.5-7B, and Llama3.2-3B-Instruct on MATH500, AIME 2024/25, Minerva\_math, Olympiadbench, and AMC23 Datasets.

2024), AMC, AIME, Synlogic-easy (validation split) (Liu et al., 2025a), and BBH (Suzgun et al., 2022). To obtain comprehensive evaluation, we adopt the unbiased pass@K metric with K up to 256, computed as  $\text{pass@K} := \mathbb{E}_{x \sim \mathcal{D}} [1 - \binom{n-c}{K} / \binom{n}{K}]$ , where  $c$  denotes the number of correct completions out of  $n$  generated responses. To reduce evaluation variance on small datasets (e.g., AIME and AMC), we set  $n = 300$ ; for other math datasets, we use  $n = 256$ , and for logic datasets,  $n = 128$ .

## 5.2 EFFECTS OF SIMKO ON TRAINING DYNAMICS

We analyze the training dynamics of SimKO in comparison with GRPO, KL-Cov, and Entropy-Adv. Figure 5 presents the changes of top-K log-probabilities ( $\Lambda^{(1)}$ ,  $\Lambda^{(2)}$ , and  $\Lambda^{(3)}$ ) across training steps.

As can be seen, GRPO leads to severe over-concentration:  $\Lambda_{\text{GRPO}}^{(1)}$  increases to nearly 1, while  $\Lambda_{\text{GRPO}}^{(2)}$  and  $\Lambda_{\text{GRPO}}^{(3)}$  sharply drop below  $10^{-8}$  and  $10^{-10}$ , respectively. This indicates that nearly all probability mass collapses onto the top-1 token. KL-Cov exhibits a moderate concentration effect due to the KL penalty, while Entropy-Adv collapses even more rapidly, likely because of its stronger emphasis on high-entropy tokens. In contrast, SimKO achieves the most effective deconcentration among all methods. This is evidenced by a lower  $\Lambda_{\text{SimKO}}^{(1)}$  and higher  $\Lambda_{\text{SimKO}}^{(2)}$  and  $\Lambda_{\text{SimKO}}^{(3)}$ . These results suggest that SimKO effectively mitigates probability mass collapse and can potentially encourage exploration during training.

To further validate this, we visualize the histogram of token-level entropy in Figure 6. GRPO drives most tokens toward near-zero entropy. SimKO, however, can preserve token entropy, particularly at "semantic forks", where high entropy is desirable for exploration. This preservation of entropy further confirms SimKO's role in promoting exploration.

| Method      | Synlogic    |             |             |             |             |             |             |             | BBH         |             |             |             |             |             |             |             |
|-------------|-------------|-------------|-------------|-------------|-------------|-------------|-------------|-------------|-------------|-------------|-------------|-------------|-------------|-------------|-------------|-------------|
|             | 1           | 2           | 4           | 8           | 16          | 32          | 64          | 128         | 1           | 2           | 4           | 8           | 16          | 32          | 64          | 128         |
| Base Model  | 3.1         | 4.9         | 7.5         | 11.1        | 15.4        | 20.0        | 24.5        | 28.7        | 42.4        | 59.3        | 74.4        | <b>84.6</b> | <b>89.9</b> | <b>92.4</b> | <b>93.6</b> | <b>94.2</b> |
| GRPO        | <b>35.3</b> | <b>38.2</b> | <b>40.8</b> | <b>42.9</b> | <b>44.7</b> | <b>46.3</b> | <b>47.9</b> | <b>49.4</b> | <b>56.4</b> | <b>64.6</b> | <b>71.3</b> | 76.6        | 80.7        | 83.9        | 86.3        | 88.2        |
| PSR         | 27.3        | 29.3        | 31.7        | 34.3        | 36.9        | 39.4        | 41.6        | 43.6        | 54.9        | 62.7        | 68.8        | 73.4        | 76.8        | 79.4        | 81.4        | 82.8        |
| NSR         | 1.1         | 1.9         | 3.2         | 5.3         | 8.5         | 12.5        | 17.2        | 21.6        | 26.1        | 41.6        | 59.3        | 74.9        | 85.3        | <u>90.5</u> | <u>92.7</u> | <u>93.5</u> |
| W-REINFORCE | 0.8         | 1.3         | 1.8         | 2.4         | 2.9         | 3.4         | 3.8         | 3.9         | 15.4        | 21.9        | 27.8        | 32.3        | 35.4        | 37.2        | 38.3        | 38.8        |
| SimKO       | <b>34.7</b> | <b>38.4</b> | <b>42.0</b> | <b>45.5</b> | <b>48.5</b> | <b>51.0</b> | <b>53.2</b> | <b>55.0</b> | <b>58.4</b> | <b>69.5</b> | <b>77.7</b> | <u>83.2</u> | <u>86.8</u> | 89.2        | 90.9        | 92.0        |

Table 2: Pass@K results for Qwen2.5-7B on Synlogic and BBH Datasets.

### 5.3 MAIN RESULTS ON MATH BENCHMARKS

We evaluate SimKO on six widely used math benchmarks across different model backbones. Table 1 reports average pass@K results for  $K$  ranging from 1 to 256. Detailed results on separate benchmarks are provided in the Appendix Table 4.

Compared to the base models, SimKO significantly improves the pass@1 score by 17.6% on Qwen2.5-Math-7B and 9.8% on Llama3.2-3B-Instruct, indicating improved exploitation. At the same time, it also boosts the pass@256 score by 4.1% and 1.9% on the same backbones respectively, demonstrating improved exploration and overall reasoning quality. Although the base model of Qwen2.5-7B achieves the highest pass@256 score (76.4% vs. 74.3% from SimKO), its pass@1 performance is notably low (26.6% vs. 38.9% from SimKO), indicating an imbalance between exploration and exploitation.

Compared to GRPO and its variants (KL-Cov and Entropy-Adv), SimKO consistently outperforms them across all model backbones and values of  $K$ . More importantly, SimKO delivers these gains without sacrificing exploration (pass@256) and with even stronger exploitation (pass@1). Relative to GRPO, SimKO improves pass@256 by 4.4%, 2.0%, and 1.3% on Qwen2.5-Math-7B, Qwen2.5-7B, and Llama3.2-3B-Instruct, respectively, while also achieving higher pass@1.

For NSR and W-REINFORCE, strong pass@256 performance is maintained, but often at the expense of much lower pass@1. In contrast, SimKO achieves a better balance on most backbones. On Qwen2.5-Math-7B, SimKO reaches a slightly higher pass@256 score (80.5% vs. 80.3% for NSR and 80.2% for W-REINFORCE) while clearly outperforming both in pass@1 (43.4% vs. 39.5% and 41.5%). A similar trend is observed on Llama3.2-3B-Instruct, where SimKO improves both pass@256 (70.8% vs. 69.7% and 68.1%) and pass@1 (24.0% vs. 22.5% and 22.4%). For Qwen2.5-7B, however, the trade-offs differ: SimKO outperforms NSR on pass@256 (74.3% vs. 72.8%) but lags slightly behind W-REINFORCE (75.2%), and on pass@1 it significantly surpasses both baselines (35.2% vs. 35.9% for NSR and 38.9% for W-REINFORCE).

These results support our hypothesis that alleviating probability over-concentration (Figure 5) improves pass@K performance, indicating a better balance between exploitation and exploration.

### 5.4 GENERALIZATION TO LOGICAL TASKS

We evaluate SimKO’s generalization ability on two logic reasoning benchmarks, as shown in Table 2. These benchmarks cover two scenarios: (1) Synlogic, an in-distribution task where the base model performs poorly in pass@K on both the training and test datasets, which come from the same distribution (Synlogic-easy), and (2) BBH, an out-of-distribution task where the base model performs better in pass@K, but the test data differs from the training data distribution.

On Synlogic, SimKO significantly outperforms the base model, with a +31.6% gain in pass@1 and +26.3% at pass@128. Methods like GRPO and PSR show improvements but lag behind SimKO by 4.6% and 11.4% at pass@128. NSR and W-REINFORCE, however, fail to train effectively, with pass@1 scores of only 1.1% and 0.8%. Similar observations can also be found in BBH dataset.

On BBH, SimKO boosts the base model’s pass@1 to 58.4% (+16.0%), and maintains stability at higher sampling rates, with just a 2.2% decrease in pass@128. GRPO and PSR, by comparison, drop 6.0% and 11.4% at pass@128 compare to base model, showing difficulties in sustaining performance. NSR and W-REINFORCE perform poorly, achieving only 26.1% and 15.4% at pass@1.

| Method                    | AIME24            | AIME25            | AMC               | MATH500          | Minerva          | Olympiad          | Avg.             |
|---------------------------|-------------------|-------------------|-------------------|------------------|------------------|-------------------|------------------|
| Base Model                | 13.2/66.0         | 5.4/51.8          | 38.2/98.5         | 55.8/96.0        | 16.5/68.8        | 25.6/77.0         | 25.8/76.4        |
| GRPO                      | 28.1/72.3         | 11.5/52.1         | 61.2/97.1         | 76.6/96.2        | 33.4/64.0        | 39.1/74.7         | 41.7/76.1        |
| $\alpha=0.02$             | 31.1/79.9         | <b>13.3/58.9</b>  | 62.6/99.3         | <b>77.6/97.0</b> | 35.2/66.2        | 39.4/76.9         | 43.2/79.7        |
| $\alpha=0.03$             | 30.9/72.7         | 12.4/64.6         | 62.4/97.5         | 77.2/97.6        | 34.9/66.9        | 38.9/76.9         | 42.8/79.4        |
| $\alpha=0.05$             | 30.8/78.7         | 12.2/ <b>67.8</b> | 63.0/97.5         | 77.2/96.8        | 34.8/65.1        | 39.3/76.3         | 42.9/80.4        |
| $\alpha=0.1$              | 29.1/75.5         | 12.4/65.0         | 61.8/ <b>99.9</b> | 77.2/96.8        | 35.2/67.6        | 38.9/ <b>77.8</b> | 42.4/80.4        |
| $\tau(0)$                 | 10.7/74.1         | 6.2/54.0          | 51.7/96.7         | 70.5/95.8        | 32.2/67.3        | 33.5/74.5         | 34.1/77.1        |
| $\tau(40)$                | 20.8/70.9         | 7.2/57.5          | 58.3/94.6         | 74.9/95.2        | 33.8/68.0        | 36.4/75.0         | 38.6/76.9        |
| $\tau(60)$                | 27.5/77.6         | 10.0/56.0         | 62.2/ <b>99.9</b> | 76.5/96.8        | <b>35.3/68.8</b> | 38.2/76.4         | 41.6/79.3        |
| w/o $\gamma^{\text{neg}}$ | 31.5/ <b>80.7</b> | 11.5/57.9         | <b>62.7/97.4</b>  | 77.1/96.2        | 34.1/65.8        | 39.0/75.6         | 42.8/78.9        |
| w/o $\gamma^{\text{pos}}$ | 30.4/75.2         | 12.7/64.9         | 62.3/99.6         | 77.4/96.4        | 34.7/65.8        | 39.5/77.3         | 42.8/79.9        |
| SimKO                     | <b>32.8/78.0</b>  | 12.9/64.6         | 62.4/97.5         | <b>77.6/96.8</b> | 35.0/68.4        | <b>39.8/77.8</b>  | <b>43.4/80.5</b> |

Table 3: Ablations on  $\alpha$ ,  $\tau$ ,  $\gamma^{\text{pos}}$ , and  $\gamma^{\text{neg}}$ . Pass@1/Pass@256 scores are evaluated using Qwen2.5-Math-7B.

These results demonstrate that relying solely on negative samples is insufficient to improve Pass@K on challenging tasks. In contrast, SimKO exhibits strong generalization, effectively trains on difficult tasks, and improves Pass@K performance by mitigating probability over- concentration.

### 5.5 ABLATION STUDIES

We conduct an in-depth analysis of how various parameters, such as  $\tau$ ,  $\alpha$ , and the impacts of  $\gamma^{\text{pos}}$  and  $\gamma^{\text{neg}}$ , affect SimKO. The full ablation results are summarized in Table 3, and the performance variations with respect to  $\tau$  and  $\alpha$  are shown in Figure 7. Specifically, we evaluate  $\alpha$  values from 0 to 0.1, where  $\alpha = 0$  represents the performance of GRPO. The results show that as  $\alpha$  increases, pass@256 consistently improves over GRPO, while pass@1 experiences a slight reduction. Notably, the performance remains relatively stable within this range of  $\alpha$ , demonstrating the robustness of our method against moderate changes in  $\alpha$ . For  $\tau$ , we test values from 0 to 100, with  $\tau = 100$  corresponding to GRPO. Notably, SimKO outperforms GRPO across all  $\tau$  values in pass@256. However, when  $\tau = 0$ , where SimKO is applied to all tokens, pass@1 drops significantly. This indicates that restricting SimKO to the "semantic forks" of the task is essential for maintaining optimal performance. Additionally, as shown in Table 3, applying SimKO exclusively to either correct or incorrect examples leads to a drop in pass@K performance. This highlights the importance of asymmetric regularization, applied to both correct and incorrect examples, as it yields the best results.

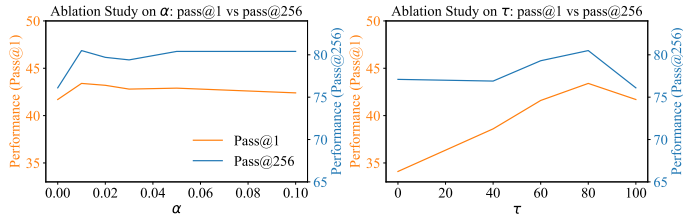Figure 7: Ablations on  $\alpha$  and  $\tau$ . Pass@1 and pass@256 scores are evaluated using the Qwen2.5-Math-7B backbone on math benchmarks.

## 6 CONCLUDING REMARKS

This paper addresses a key limitation in current RLVR methods, where pass@K performance drops due to reduced output diversity. Through analyzing token-level posterior probabilities, we find that RLVR training causes the model to overly concentrate probability mass on the top-1 candidate, leading to a deterministic policy and limited exploration. To overcome this issue, we propose Simple Pass@K Optimization (SimKO), a method that mitigates this effect by redistributing gradient updates across the top-K candidates. Extensive evaluations demonstrate that SimKO effectively preserves output diversity and consistently outperforms the GRPO baseline on both pass@1 and pass@256 metrics. These results highlight that SimKO achieves a superior balance between exploitation and exploration, thereby enhancing the model's overall reasoning capabilities.

## ICLR PAPER CHECKLIST

1. **Ethics Statement**

**Answer:** This research fully adheres to the ICLR Code of Ethics. The study does not involve human subjects or the use of personal or sensitive data. All datasets and code utilized and released conform to their respective licenses and terms of use. The contributions in this work are foundational and do not raise issues related to fairness, privacy, security, or potential misuse. We confirm that all ethical considerations have been thoroughly addressed.

2. **Reproducibility Statement**

**Answer:** We are committed to making our work easy to reproduce. All necessary details for replicating our main experimental results— including data access, experimental setup, model configurations, and evaluation metrics— will be uploaded to GitHub after the paper is accepted. Users can follow our documentation and scripts to accurately reproduce the results, ensuring transparency and scientific rigor.

3. **The Use of Large Language Models**

**Answer:** We utilize large language models to assist in enhancing our writing by checking for typos, improving the fluency of expressions, and ensuring that the language adheres to academic standards. This helps make the writing more structured and professional, ultimately making it easier for the audience to understand the content.

## REFERENCES

- AI@Meta. Llama 3 model card. 2024. URL [https://github.com/meta-llama/llama3/blob/main/MODEL\\_CARD.md](https://github.com/meta-llama/llama3/blob/main/MODEL_CARD.md). 6
- Zhipeng Chen, Xiaobo Qin, Youbin Wu, Yue Ling, Qinghao Ye, Wayne Xin Zhao, and Guang Shi. Pass@ k training for adaptively balancing exploration and exploitation of large reasoning models. *arXiv preprint arXiv:2508.10751*, 2025. 2, 13
- Daixuan Cheng, Shaohan Huang, Xuekai Zhu, Bo Dai, Wayne Xin Zhao, Zhenliang Zhang, and Furu Wei. Reasoning with exploration: An entropy perspective. *arXiv preprint arXiv:2506.14758*, 2025. 2, 6, 13
- Karl Cobbe, Vineet Kosaraju, Mohammad Bavarian, Mark Chen, Heewoo Jun, Lukasz Kaiser, Matthias Plappert, Jerry Tworek, Jacob Hilton, Reiichiro Nakano, et al. Training verifiers to solve math word problems. *arXiv preprint arXiv:2110.14168*, 2021. 6
- Ganqu Cui, Yuchen Zhang, Jiacheng Chen, Lifan Yuan, Zhi Wang, Yuxin Zuo, Haozhan Li, Yuchen Fan, Huayu Chen, Weize Chen, et al. The entropy mechanism of reinforcement learning for reasoning language models. *arXiv preprint arXiv:2505.22617*, 2025. 2, 6, 13
- DeepSeek-AI. Deepseek-r1: Incentivizing reasoning capability in llms via reinforcement learning, 2025. URL <https://arxiv.org/abs/2501.12948>. 13
- Yihong Dong, Xue Jiang, Yongding Tao, Huanyu Liu, Kechi Zhang, Lili Mou, Rongyu Cao, Yingwei Ma, Jue Chen, Binhua Li, et al. RL-plus: Countering capability boundary collapse of llms in reinforcement learning with hybrid-policy optimization. *arXiv preprint arXiv:2508.00222*, 2025. 2, 13
- Angela Fan, Mike Lewis, and Yann Dauphin. Hierarchical neural story generation. *arXiv preprint arXiv:1805.04833*, 2018. 5
- Chaoqun He, Renjie Luo, Yuzhuo Bai, Shengding Hu, Zhen Leng Thai, Junhao Shen, Jinyi Hu, Xu Han, Yujie Huang, Yuxiang Zhang, et al. Olympiadbench: A challenging benchmark for promoting agi with olympiad-level bilingual multimodal scientific problems. *arXiv preprint arXiv:2402.14008*, 2024. 6
- Jujie He, Jiakai Liu, Chris Yuhao Liu, Rui Yan, Chaojie Wang, Peng Cheng, Xiaoyu Zhang, Fuxiang Zhang, Jiacheng Xu, Wei Shen, et al. Skywork open reasoner 1 technical report. *arXiv preprint arXiv:2505.22312*, 2025. 13

- 540 Dan Hendrycks, Collin Burns, Saurav Kadavath, Akul Arora, Steven Basart, Eric Tang, Dawn Song,  
541 and Jacob Steinhardt. Measuring mathematical problem solving with the math dataset. *arXiv*  
542 *preprint arXiv:2103.03874*, 2021. 6
- 543
- 544 Zhenyu Hou, Xin Lv, Rui Lu, Jiajie Zhang, Yujiang Li, Zijun Yao, Juanzi Li, Jie Tang, and Yux-  
545 iao Dong. Advancing language model reasoning through reinforcement learning and inference  
546 scaling. *arXiv preprint arXiv:2501.11651*, 2025. 13
- 547 Jingcheng Hu, Yinmin Zhang, Qi Han, Daxin Jiang, Xiangyu Zhang, and Heung-Yeung Shum.  
548 Open-reasoner-zero: An open source approach to scaling up reinforcement learning on the base  
549 model, 2025. URL <https://arxiv.org/abs/2503.24290>. 13
- 550
- 551 Hugging Face. Open r1: A fully open reproduction of deepseek-r1, January 2025. URL <https://github.com/huggingface/open-r1>. 13
- 552
- 553 Aitor Lewkowycz, Anders Andreassen, David Dohan, Ethan Dyer, Henryk Michalewski, Vinay Ra-  
554 masesh, Ambrose Slone, Cem Anil, Imanol Schlag, Theo Gutman-Solo, et al. Solving quantitative  
555 reasoning problems with language models. *Advances in neural information processing systems*,  
556 35:3843–3857, 2022. 6
- 557
- 558 Jiazheng Li, Hong Lu, Kaiyue Wen, Zaiwen Yang, Jiakuan Gao, Hongzhou Lin, Yi Wu, and  
559 Jingzhao Zhang. Questa: Expanding reasoning capacity in llms via question augmentation. *arXiv*  
560 *preprint arXiv:2507.13266*, 2025. 2, 13
- 561 Xiao Liang, Zhongzhi Li, Yeyun Gong, Yelong Shen, Ying Nian Wu, Zhijiang Guo, and Weizhu  
562 Chen. Beyond pass@ 1: Self-play with variational problem synthesis sustains rlvr. *arXiv preprint*  
563 *arXiv:2508.14029*, 2025. 2, 13
- 564
- 565 Junteng Liu, Yuanxiang Fan, Zhuo Jiang, Han Ding, Yongyi Hu, Chi Zhang, Yiqi Shi, Shitong  
566 Weng, Aili Chen, Shiqi Chen, et al. Synlogic: Synthesizing verifiable reasoning data at scale for  
567 learning logical reasoning and beyond. *arXiv preprint arXiv:2505.19641*, 2025a. 7
- 568 Zichen Liu, Changyu Chen, Wenjun Li, Penghui Qi, Tianyu Pang, Chao Du, Wee Sun Lee,  
569 and Min Lin. Understanding r1-zero-like training: A critical perspective. *arXiv preprint*  
570 *arXiv:2503.20783*, 2025b. 13
- 571
- 572 Rafael Müller, Simon Kornblith, and Geoffrey E Hinton. When does label smoothing help? *Ad-*  
573 *vances in neural information processing systems*, 32, 2019. 5
- 574
- 575 Yi Ren and Danica J. Sutherland. Learning dynamics of LLM finetuning. In *The Thirteenth Interna-*  
576 *tional Conference on Learning Representations*, 2025. URL [https://openreview.net/](https://openreview.net/forum?id=tPNHOoZF19)  
[forum?id=tPNHOoZF19](https://openreview.net/forum?id=tPNHOoZF19). 3, 6, 13
- 577
- 578 John Schulman, Filip Wolski, Prafulla Dhariwal, Alec Radford, and Oleg Klimov. Proximal policy  
579 optimization algorithms. *arXiv preprint arXiv:1707.06347*, 2017. 2
- 580
- 581 Zhihong Shao, Peiyi Wang, Qihao Zhu, Runxin Xu, Junxiao Song, Xiao Bi, Haowei Zhang,  
582 Mingchuan Zhang, YK Li, Yang Wu, et al. Deepseekmath: Pushing the limits of mathemati-  
cal reasoning in open language models. *arXiv preprint arXiv:2402.03300*, 2024. 2, 13
- 583
- 584 Mirac Suzgun, Nathan Scales, Nathanael Schärli, Sebastian Gehrmann, Yi Tay, Hyung Won Chung,  
585 Aakanksha Chowdhery, Quoc V Le, Ed H Chi, Denny Zhou, et al. Challenging big-bench tasks  
586 and whether chain-of-thought can solve them. *arXiv preprint arXiv:2210.09261*, 2022. 7
- 587
- 588 Qwen Team. Qwen2.5: A party of foundation models, September 2024. URL [https://qwenlm.](https://qwenlm.github.io/blog/qwen2.5/)  
[github.io/blog/qwen2.5/](https://qwenlm.github.io/blog/qwen2.5/). 6
- 589
- 590 Christian Walder and Deep Karkhanis. Pass@ k policy optimization: Solving harder reinforcement  
591 learning problems. *arXiv preprint arXiv:2505.15201*, 2025. 2, 13
- 592
- 593 Shenzi Wang, Le Yu, Chang Gao, Chujie Zheng, Shixuan Liu, Rui Lu, Kai Dang, Xionghui Chen,  
Jianxin Yang, Zhenru Zhang, et al. Beyond the 80/20 rule: High-entropy minority tokens drive  
effective reinforcement learning for llm reasoning. *arXiv preprint arXiv:2506.01939*, 2025. 4, 13

- 594 Fang Wu, Weihao Xuan, Ximing Lu, Zaid Harchaoui, and Yejin Choi. The invisible leash: Why rlvr  
595 may not escape its origin. *arXiv preprint arXiv:2507.14843*, 2025. 1, 13  
596
- 597 An Yang, Beichen Zhang, Binyuan Hui, Bofei Gao, Bowen Yu, Chengpeng Li, Dayiheng Liu, Jian-  
598 hong Tu, Jingren Zhou, Junyang Lin, et al. Qwen2. 5-math technical report: Toward mathematical  
599 expert model via self-improvement. *arXiv preprint arXiv:2409.12122*, 2024. 6
- 600 Zhicheng Yang, Zhijiang Guo, Yinya Huang, Yongxin Wang, Dongchun Xie, Yiwei Wang, Xiaodan  
601 Liang, and Jing Tang. Depth-breadth synergy in rlvr: Unlocking llm reasoning gains with adaptive  
602 exploration. *arXiv preprint arXiv:2508.13755*, 2025. 2, 13  
603
- 604 Qiying Yu, Zheng Zhang, Ruofei Zhu, Yufeng Yuan, Xiaochen Zuo, Yu Yue, Weinan Dai, Tiantian  
605 Fan, Gaohong Liu, Lingjun Liu, et al. Dapo: An open-source llm reinforcement learning system  
606 at scale. *arXiv preprint arXiv:2503.14476*, 2025. 13
- 607 Yang Yue, Zhiqi Chen, Rui Lu, Andrew Zhao, Zhaokai Wang, Shiji Song, and Gao Huang. Does re-  
608 inforcement learning really incentivize reasoning capacity in llms beyond the base model? *arXiv*  
609 *preprint arXiv:2504.13837*, 2025. 1, 13
- 610 Weihao Zeng, Yuzhen Huang, Qian Liu, Wei Liu, Keqing He, Zejun Ma, and Junxian He. Simplerl-  
611 zoo: Investigating and taming zero reinforcement learning for open base models in the wild. In  
612 *Second Conference on Language Modeling*, 2025. 6, 13  
613
- 614 Chujie Zheng, Shixuan Liu, Mingze Li, Xiong-Hui Chen, Bowen Yu, Chang Gao, Kai Dang,  
615 Yuqiong Liu, Rui Men, An Yang, et al. Group sequence policy optimization. *arXiv preprint*  
616 *arXiv:2507.18071*, 2025. 13
- 617 Xinyu Zhu, Mengzhou Xia, Zhepei Wei, Wei-Lin Chen, Danqi Chen, and Yu Meng. The surprising  
618 effectiveness of negative reinforcement in llm reasoning. *arXiv preprint arXiv:2506.01347*, 2025.  
619 3, 4, 6, 15  
620  
621  
622  
623  
624  
625  
626  
627  
628  
629  
630  
631  
632  
633  
634  
635  
636  
637  
638  
639  
640  
641  
642  
643  
644  
645  
646  
647

## 648 A RELATED WORKS

### 649 A.1 REINFORCEMENT LEARNING WITH VERIFIABLE REWARDS IN LLMs

650 Reinforcement learning with verifiable rewards (RLVR) from large language models (LLMs) has  
 651 demonstrated significant potential (DeepSeek-AI, 2025; Hugging Face, 2025; Zeng et al., 2025; He  
 652 et al., 2025), especially when directly applied to a base model using GRPO (Shao et al., 2024) for  
 653 RL training. This approach has notably enhanced the base model’s performance, particularly in im-  
 654 proving its reasoning abilities for mathematical and coding tasks. Subsequent works have focused  
 655 on improving GRPO to further enhance the algorithm’s performance. For instance, DAPO (Yu et al.,  
 656 2025) independently adjusts GRPO’s clipping thresholds and removes KL regularization to encour-  
 657 age larger updates in correct answer. Dr.GRPO (Liu et al., 2025b) eliminates the normalization  
 658 term when computing advantages to prevent length bias. GSPO (Zheng et al., 2025) modifies the  
 659 importance sampling from the token level to the sequence level, which proves to be more stable in  
 660 training mixture-of-experts (MoE) models. These modifications have contributed to improvements  
 661 in the model’s pass@1 performance, but they have not specifically addressed pass@K performance,  
 662 which relates to the model’s exploration ability.  
 663

### 664 A.2 EFFECTIVE EXPLORATION FOR RLVR IN LLMs

665 A central challenge in RLVR tasks lies in moving beyond the exploitation of a pretrained model’s  
 666 implicit knowledge to actively exploring diverse reasoning paths. Current methods tend to con-  
 667 verge on a limited set of solutions, as evidenced by poor performance on the pass@K metric, which  
 668 evaluates the coverage of multiple reasoning paths and thus reflects exploration effectiveness (Yue  
 669 et al., 2025; Wu et al., 2025). To address this exploration deficit, the community has pursued several  
 670 strategies. *Data-centric* methods aim to use data augmentation to enhance the model’s exposure to  
 671 diverse reasoning environments, thereby encouraging the exploration of a broader range of solution  
 672 paths. One such approach involves using off-policy data from more capable models to expand the  
 673 model’s knowledge and promote solution diversity (Dong et al., 2025; Li et al., 2025). Additional  
 674 strategies include generating varied responses for challenging samples (Yang et al., 2025) or para-  
 675 phrasing questions to stimulate different reasoning trajectories for the same problem (Liang et al.,  
 676 2025). As a complementary approach, *Reward-centric* methods redesign the objective function to  
 677 directly incentivize diversity by calculating a group-wise reward based on a set of candidate solu-  
 678 tions, providing an unbiased gradient for optimizing Pass@K (Walder & Karkhanis, 2025; Chen  
 679 et al., 2025). While these methods are effective to some extent, both treat the model as a black box,  
 680 manipulating its inputs and final supervisory signals without understanding the internal mechanisms  
 681 driving exploration. To address this limitation, a more recent line of work has shifted focus inward.  
 682 The *Entropy-based* methods using entropy as a proxy for behavioral diversity and exploration (Cui  
 683 et al., 2025; Cheng et al., 2025; Wang et al., 2025; Hou et al., 2025; Hu et al., 2025). However,  
 684 policy entropy is a rough and indirect measure that does not allow for fine-grained observation of  
 685 changes in the model’s distribution. This limitation highlights the need for a mechanism that can di-  
 686 rectly monitor and explore how the distribution of next-token predictions changes during the model’s  
 687 training process, which is the central focus of our work.  
 688

## 689 B MORE ABOUT THE DESIGN OF $\gamma_{i,l}^{\text{POS}}$

690 This appendix provides more details about how we design Equation-(6):

$$691 \gamma_{i,l}^{\text{pos}} = (1 - \alpha) \gamma_{i,t} + \frac{\alpha}{|\mathcal{I}_{\text{topk}}|} \sum_{k \in \mathcal{I}_{\text{topk}}} \text{sg} \left( \frac{\gamma_{i,l}}{\gamma_{i,l}^{(k)}} \right) \gamma_{i,l}^{(k)}, \quad \alpha \in [0, 1],$$

692 Based on the smoothed  $\tilde{\mathcal{G}}(i, l)$  term in Equation-(5):

$$693 \tilde{\mathcal{G}}(i, l) = \pi_{\theta}(\cdot | s_{i,l}) - \tilde{\mathbf{e}}_{\text{topk}} = \pi_{\theta}(\cdot | s_{i,l}) - \left( (1 - \alpha) \mathbf{e}_y + \frac{\alpha}{K} \sum_{k \in \mathcal{I}_{\text{topk}}} \mathbf{e}_k \right),$$

694 Following the  $\mathcal{AKG}$  decomposition in Ren & Sutherland (2025), we know

$$695 \nabla_{\theta} \gamma_{i,l} = \underbrace{A_{i,l} \cdot \text{sg}(\gamma_{i,l})}_{\text{Constant}} \cdot \underbrace{\nabla_{\mathbf{z}} \log \pi_{\theta}(y_i | s_{i,l})}_{\text{Defined as } \mathcal{G}(i,l)} = A_{i,l} \cdot \text{sg}(\gamma_{i,l}) \cdot \nabla_{\theta} \mathbf{z} \mathcal{G}(i, l).$$

Now, we replace  $\mathcal{G}(i, l)$  term to  $\tilde{\mathcal{G}}(i, l)$ , the gradient part  $(A_{i,l} \cdot \text{sg}(\gamma_{i,l}))$  is a constant w.r.t  $\theta$ :

$$\begin{aligned}
\nabla_{\theta} \mathbf{z} \tilde{\mathcal{G}}(i, l) &= \nabla_{\theta} \mathbf{z} \left( \pi_{\theta}(\cdot | s_{i,l}) - \left( (1 - \alpha) \mathbf{e}_y + \frac{\alpha}{K} \sum_{k \in \mathcal{I}_{\text{topk}}} \mathbf{e}_k \right) \right) \\
&= \nabla_{\theta} \mathbf{z} \left( (1 - \alpha) \pi_{\theta}(\cdot | s_{i,l}) + \alpha \pi_{\theta}(\cdot | s_{i,l}) - \left( (1 - \alpha) \mathbf{e}_y + \frac{\alpha}{K} \sum_{k \in \mathcal{I}_{\text{topk}}} \mathbf{e}_k \right) \right) \\
&= \nabla_{\theta} \mathbf{z} \left( (1 - \alpha) (\pi_{\theta}(\cdot | s_{i,l}) - \mathbf{e}_y) + \frac{\alpha}{K} \sum_{k \in \mathcal{I}_{\text{topk}}} (\pi_{\theta}(\cdot | s_{i,l}) - \mathbf{e}_k) \right) \\
&= (1 - \alpha) \nabla_{\theta} \mathbf{z} \mathcal{G}(i, y) + \frac{\alpha}{K} \sum_{k \in \mathcal{I}_{\text{topk}}} \nabla_{\theta} \mathbf{z} \mathcal{G}(i, k)
\end{aligned} \tag{7}$$

From the equation above, we know that if we change  $\mathbf{e}_y$  in the original  $\gamma$  to  $\tilde{\mathbf{e}}_{\text{topk}}$ , the gradient of the new loss can be simplified to a combination of the above. Note that  $A_{i,l} \cdot \text{sg}(\gamma_{i,l}) \cdot \nabla_{\theta} \mathbf{z} \mathcal{G}(i, k)$  is exactly the decomposition of  $\gamma_{i,l}^{(k)} = \frac{\pi_{\theta}(y_{i,l}^{(k)} | s_{i,t})}{\pi_{\theta_{\text{ref}}}(y_{i,l}^{(k)} | s_{i,l})}$ , i.e., updating the model using  $y_{i,l}^{(k)}$ . In other words, our new loss might have a form like

$$(1 - \alpha) \gamma_{i,l} + \frac{\alpha}{K} \sum_{k \in \mathcal{I}_{\text{topk}}} \gamma_{i,l}^{(k)}$$

However, the combination above will make the new  $\gamma$  a biased estimator (the RL theoretical guarantee needs a correct importance sampling). We then use the following stop-gradient trick to fix this. Specifically, by multiplying  $\text{sg}(\gamma_{i,l} / \gamma_{i,l}^{(k)})$  to the second term in Equation-(7), we can ensure that  $\text{sg}(\gamma_{i,l}^{\text{pos}}) = \text{sg}(\gamma_{i,l})$ . This design is only one line of code, using the `.detach()` in Pytorch.

## C ADDITIONAL ANALYSIS OF TEARNING DYNAMICS

In Figure 8, we present the training dynamics for all three models, which validate our findings in Section 3 across multiple models.

## D EXPERIMENT

### D.1 TRAINING DETAIL

All models are trained with a learning rate of  $10^{-6}$ , a batch size of 1024, and a PPO mini-batch size of 256. Each input problem is sampled with 8 responses using temperature 1.0. We set  $\alpha$  in SimKO as 0.01, and define the entropy threshold  $\tau(q)$  as the  $q$ -quantile of the token-level entropy distribution, such that a fraction  $q$  of all tokens have entropy values lower than  $\tau(q)$ . Unless otherwise specified, we use  $\tau(0.8)$  in our experiments. We also set  $\lambda_{\text{top1}} = 1.1$ , except for Qwen2.5-7B where we use  $\lambda_{\text{top1}} = 1.05$ . For the logic task, we apply a warm-up of 50 steps and use a smaller  $\alpha = 0.005$  along with  $\lambda_{\text{top1}} = 1.05$ .

### D.2 MORE EXPERIMENT RESULT

In this section, we present more detailed experimental results, as shown in Table 4.

## E THE USE OF LARGE LANGUAGE MODELS

We utilize large language models to assist in enhancing our writing by checking for typos, improving the fluency of expressions, and ensuring that the language adheres to academic standards. This helps make the writing more structured and professional, ultimately making it easier for the audience to understand the content.

756  
757  
758  
759  
760  
761  
762  
763  
764  
765  
766  
767  
768  
769  
770  
771  
772  
773  
774  
775  
776  
777  
778  
779  
780  
781  
782  
783  
784  
785  
786  
787  
788  
789  
790  
791  
792  
793  
794  
795  
796  
797  
798  
799  
800  
801  
802  
803  
804  
805  
806  
807  
808  
809

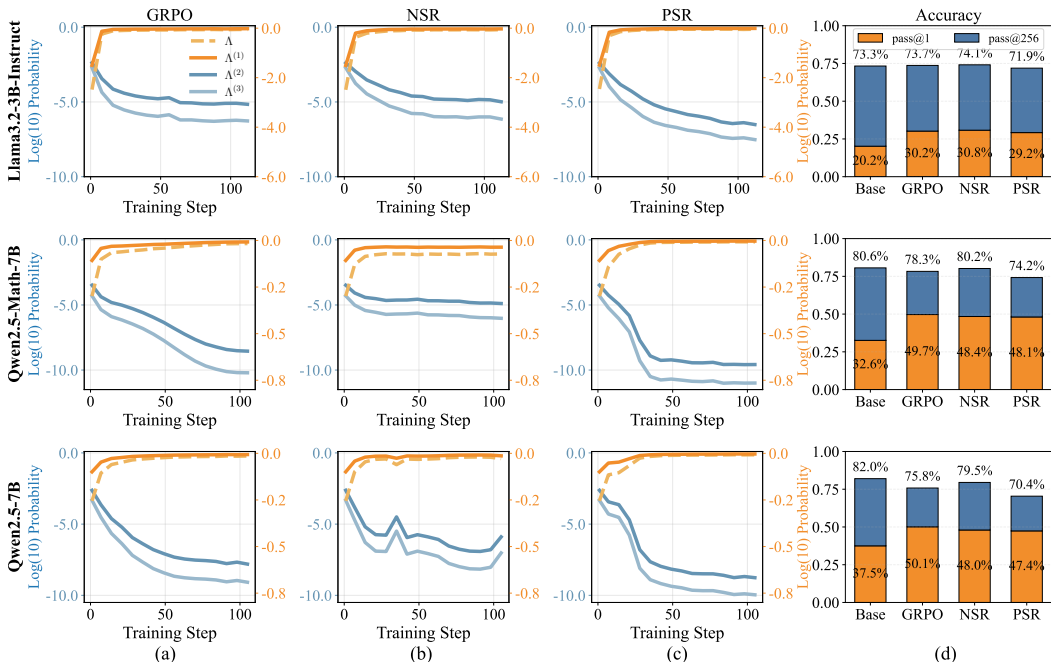

Figure 8: (a)-(c) Training dynamics of average log probability  $\Lambda$  and top-K probabilities  $\Lambda^{(k)}$  derived by GRPO, NSR, and PSR. (d) The corresponding pass@1 and pass@K results of the RLVL-trained models. Following the setups of Zhu et al. (2025), we train a Llama3.2-3B-Instruct on a mixture of GSM8K and MATH (Level 1) and train Qwen2.5-Math-7B on the MATH dataset.

Table 4: Pass@1 / Pass@256 Results for Qwen2.5-Math-7B, Qwen2.5-7B, and Llama3.2-3B-Instruct on MATH500, AIME 2024/25, Minerva\_math, Olympiadbench, and AMC23 Datasets.

| Method                      | AIME24    | AIME25     | AMC23      | MATH500   | Minerva   | Olympiad  | Avg.      |
|-----------------------------|-----------|------------|------------|-----------|-----------|-----------|-----------|
| <b>Qwen2.5-Math-7B</b>      |           |            |            |           |           |           |           |
| Base Model                  | 13.2/66.0 | 5.4/51.8   | 38.2/98.5  | 55.8/96.0 | 16.5/68.8 | 25.6/77.0 | 25.8/76.4 |
| GRPO                        | 28.1/72.3 | 11.5/52.1  | 61.2/97.1  | 76.6/96.2 | 33.4/64.0 | 39.1/74.7 | 41.7/76.1 |
| PSR                         | 19.3/68.5 | 11.2/48.9  | 62.1/94.9  | 74.0/91.4 | 32.8/63.6 | 37.6/67.7 | 39.5/72.5 |
| NSR                         | 22.8/80.3 | 9.7/61.2   | 59.4/100.0 | 74.6/97.0 | 32.9/65.1 | 37.8/78.4 | 39.5/80.3 |
| W-REINFORCE                 | 29.2/86.5 | 10.8/55.7  | 61.1/97.4  | 76.4/96.4 | 33.4/67.6 | 38.1/77.6 | 41.5/80.2 |
| KL-Cov                      | 30.9/81.2 | 11.7/55.2  | 62.2/97.4  | 76.5/97.0 | 34.4/66.2 | 39.2/76.9 | 42.5/79.0 |
| GRPO w/Entropy-Adv          | 29.1/81.7 | 10.9/55.0  | 62.5/92.1  | 77.1/95.0 | 33.5/60.7 | 39.7/71.9 | 42.1/76.1 |
| SimKO                       | 32.8/78.0 | 12.9/64.6  | 62.4/97.5  | 77.6/96.8 | 35.0/68.4 | 39.8/77.8 | 43.4/80.5 |
| $\Delta(\text{SimKO-GRPO})$ | +4.7/+5.7 | +1.4/+12.5 | +1.2/+0.4  | +1.0/+0.6 | +1.6/+4.4 | +0.7/+3.1 | +1.7/+4.4 |
| <b>Qwen2.5-7B</b>           |           |            |            |           |           |           |           |
| Base Model                  | 7.4/64.0  | 3.6/48.8   | 36.1/99.6  | 61.4/97.2 | 23.0/70.2 | 28.1/78.5 | 26.6/76.4 |
| GRPO                        | 15.6/59.0 | 8.8/55.0   | 56.0/92.5  | 75.7/95.2 | 35.7/61.8 | 38.8/70.4 | 38.4/72.3 |
| PSR                         | 14.3/61.8 | 9.3/54.2   | 51.6/96.7  | 73.6/92.0 | 32.9/52.2 | 35.6/67.0 | 36.2/70.7 |
| NSR                         | 9.9/48.9  | 7.1/52.3   | 49.8/97.1  | 73.9/95.4 | 33.7/65.8 | 36.6/77.0 | 35.2/72.8 |
| W-REINFORCE                 | 11.2/57.5 | 6.1/54.2   | 54.3/99.6  | 73.9/95.8 | 33.4/66.2 | 36.6/77.9 | 35.9/75.2 |
| SimKO                       | 16.3/58.4 | 9.4/55.2   | 57.3/97.1  | 76.7/94.8 | 35.2/66.2 | 38.7/74.4 | 38.9/74.3 |
| $\Delta(\text{SimKO-GRPO})$ | +0.7/-0.6 | +0.6/+0.2  | 1.3/+4.6   | 1.0/-0.4  | -0.5/+4.4 | -0.1/+4.0 | +0.5/+2.0 |
| <b>Llama3.2-3B-Instruct</b> |           |            |            |           |           |           |           |
| Base Model                  | 3.4/51.7  | 0.7/46.7   | 20.3/94.9  | 37.8/93.6 | 10.1/59.2 | 12.7/67.1 | 14.2/68.9 |
| GRPO                        | 12.7/55.1 | 1.1/44.1   | 32.5/96.7  | 53.1/91.6 | 17.3/62.5 | 20.1/67.0 | 23.3/69.5 |
| PSR                         | 7.8/57.4  | 1.0/35.1   | 27.2/98.8  | 50.3/91.0 | 18.5/61.0 | 18.9/63.7 | 20.6/67.8 |
| NSR                         | 11.1/53.7 | 1.5/47.4   | 30.3/94.6  | 53.3/94.0 | 19.0/60.3 | 20.0/68.0 | 22.5/69.7 |
| W-REINFORCE                 | 13.3/51.7 | 1.1/42.1   | 31.4/96.3  | 52.4/92.8 | 16.7/59.9 | 19.6/65.8 | 22.4/68.1 |
| SimKO                       | 13.8/54.6 | 1.0/45.4   | 35.2/98.8  | 54.6/93.4 | 18.5/63.2 | 21.0/69.6 | 24.0/70.8 |
| $\Delta(\text{SimKO-GRPO})$ | +1.1/-0.5 | -0.1/+1.3  | +2.7/+2.1  | +1.5/+1.8 | +1.2/+0.7 | +0.9/+2.6 | +0.7/+1.3 |
